# Supplementary material
Source: PubMed Central journal article supplement (PMC8072068)
Supplement: mmc1.pdf [file mmc1.pdf]

**Stem Cell Reports, Volume 16**

**Supplemental Information**

**Human Pluripotent Stem Cell-Derived Intestinal Organoids Model  
SARS-CoV-2 Infection Revealing a Common Epithelial Inflammatory  
Response**

**Aditya Mithal, Adam J. Hume, Jonathan Lindstrom-Vautrin, Carlos Villacorta-Martin, Judith Olejnik, Esther Bullitt, Anne Hinds, Elke Mühlberger, and Gustavo Mostoslavsky**

## SUPPLEMENTAL INFORMATION

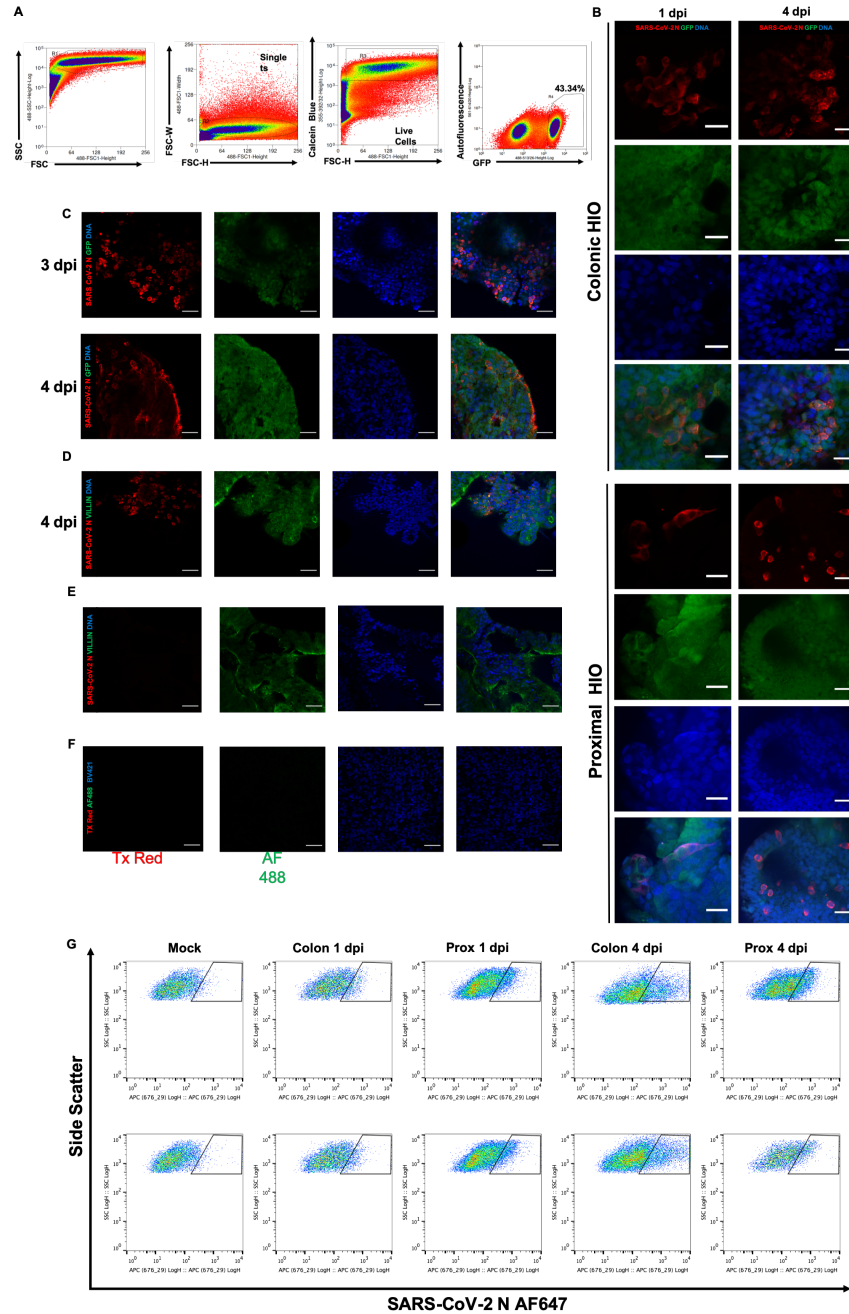

**Figure S1.** Further characterization of regionally patterned HIOs and subsequent SARS-CoV-2 infection. (A) FACS gating strategy for sorting D15 CDX2-eGFP<sup>+</sup> intestinal progenitors during directed differentiation of mesenchyme free HIOs from BU1CG iPSCs. (B-F) Immunofluorescence micrographs of SARS-CoV-2 infected HIOs (B) Higher magnification confocal micrographs of whole mount colonic (top) and proximal (bottom) HIOs stained for SARS-CoV-2 N protein and GFP (scale bar = 25 μm) (C) Immunofluorescent confocal micrographs of whole mount HIOs stained for SARS-CoV-2 N protein and GFP (scale bar = 50 μm) at 3- and 4-days post infection demonstrates robust and widespread SARS-CoV-2 infection of CDX2-GFP<sup>+</sup> intestinal epithelial cells. (D) Immunofluorescent confocal micrographs of whole mount HIOs stained for SARS-CoV-2 N protein and enterocyte cytoskeletal component Villin at 4 dpi. (E) Immunofluorescent micrographs of whole mounted mock infected day 36 HIOs stained for SARS-CoV-2 N protein and Villin. (F) Whole mounted SARS-CoV-2 4 dpi HIOs demonstrating minimal background signal from staining with only secondary antibodies. (scale bar = 50 μm) (G) Flow Cytometry for SARS-CoV-2 N protein expression in HIOs at 1 and 4 dpi, gated on single cells by forward and side scatter (n=2 replicates per condition), Related to Figures 1-2.

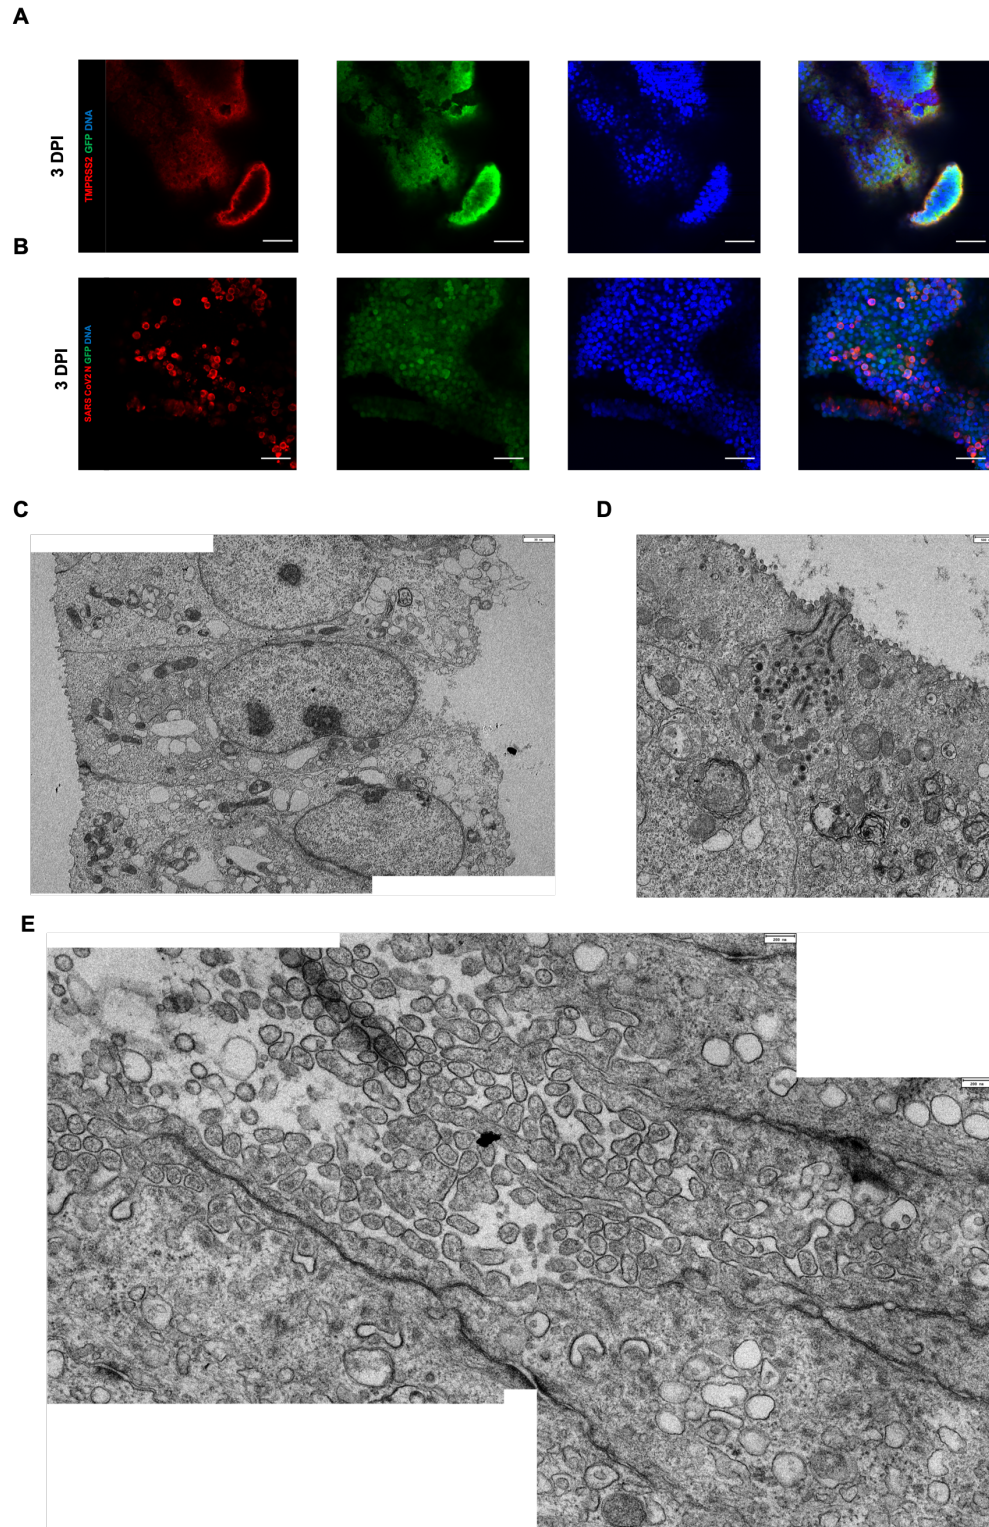

**Figure S2: Further characterization of infected and mock HIOs. (A) Differentiated iPSC-derived colonic HIOs express TMPRSS2 and (B) SARS-CoV-2 Nucleocapsid at 3 dpi. (Scale bar = 50  $\mu$ m). (C-E) Electron microscopy of mock colonic and proximal HIOs showing putative enterocytes with characteristic brush border and polarized nuclei (C) and putative secretory cells containing high density secretory granules (D-E) (scale bars noted in each image), Related to Figure 2-3.**

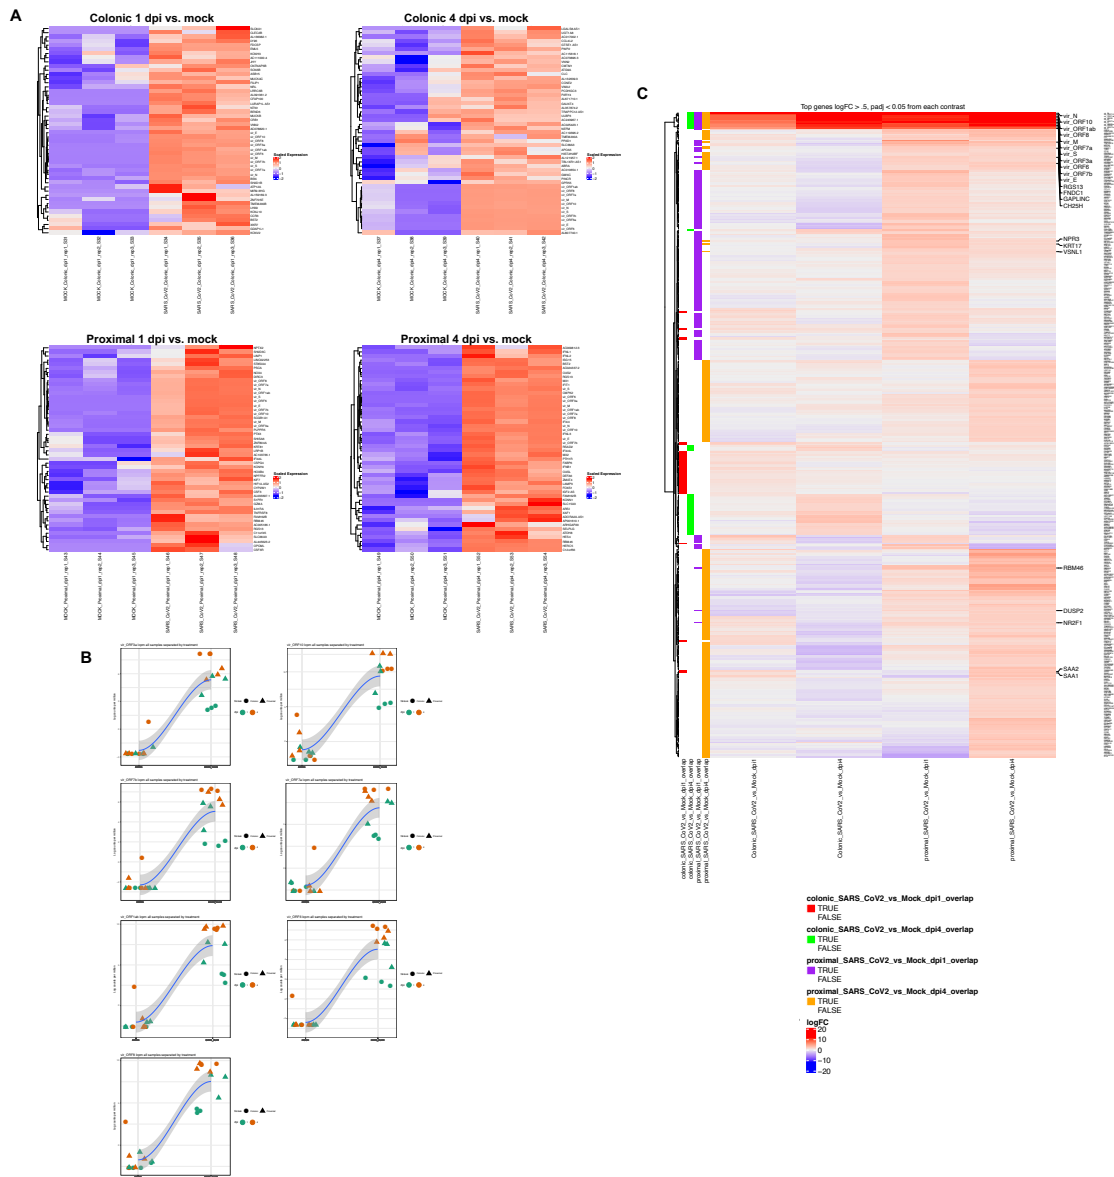

Figure S3: Additional bulk RNA sequencing analysis of SARS-CoV-2 infected HIOs. (A) Unsupervised hierarchical clustering heat maps of the top 50 differentially expressed genes with each replicate independently represented. (B) LOESS plots of additional viral genes in mock (left) and infected (right) HIOs in both tissue types at 1 and 4 dpi. (C) Unsupervised hierarchical clustering heatmap of differentially expressed genes in infected vs. mock samples at 1 and 4 dpi (LogFC>0.5, FDR <0.05), Related to Figure 4.

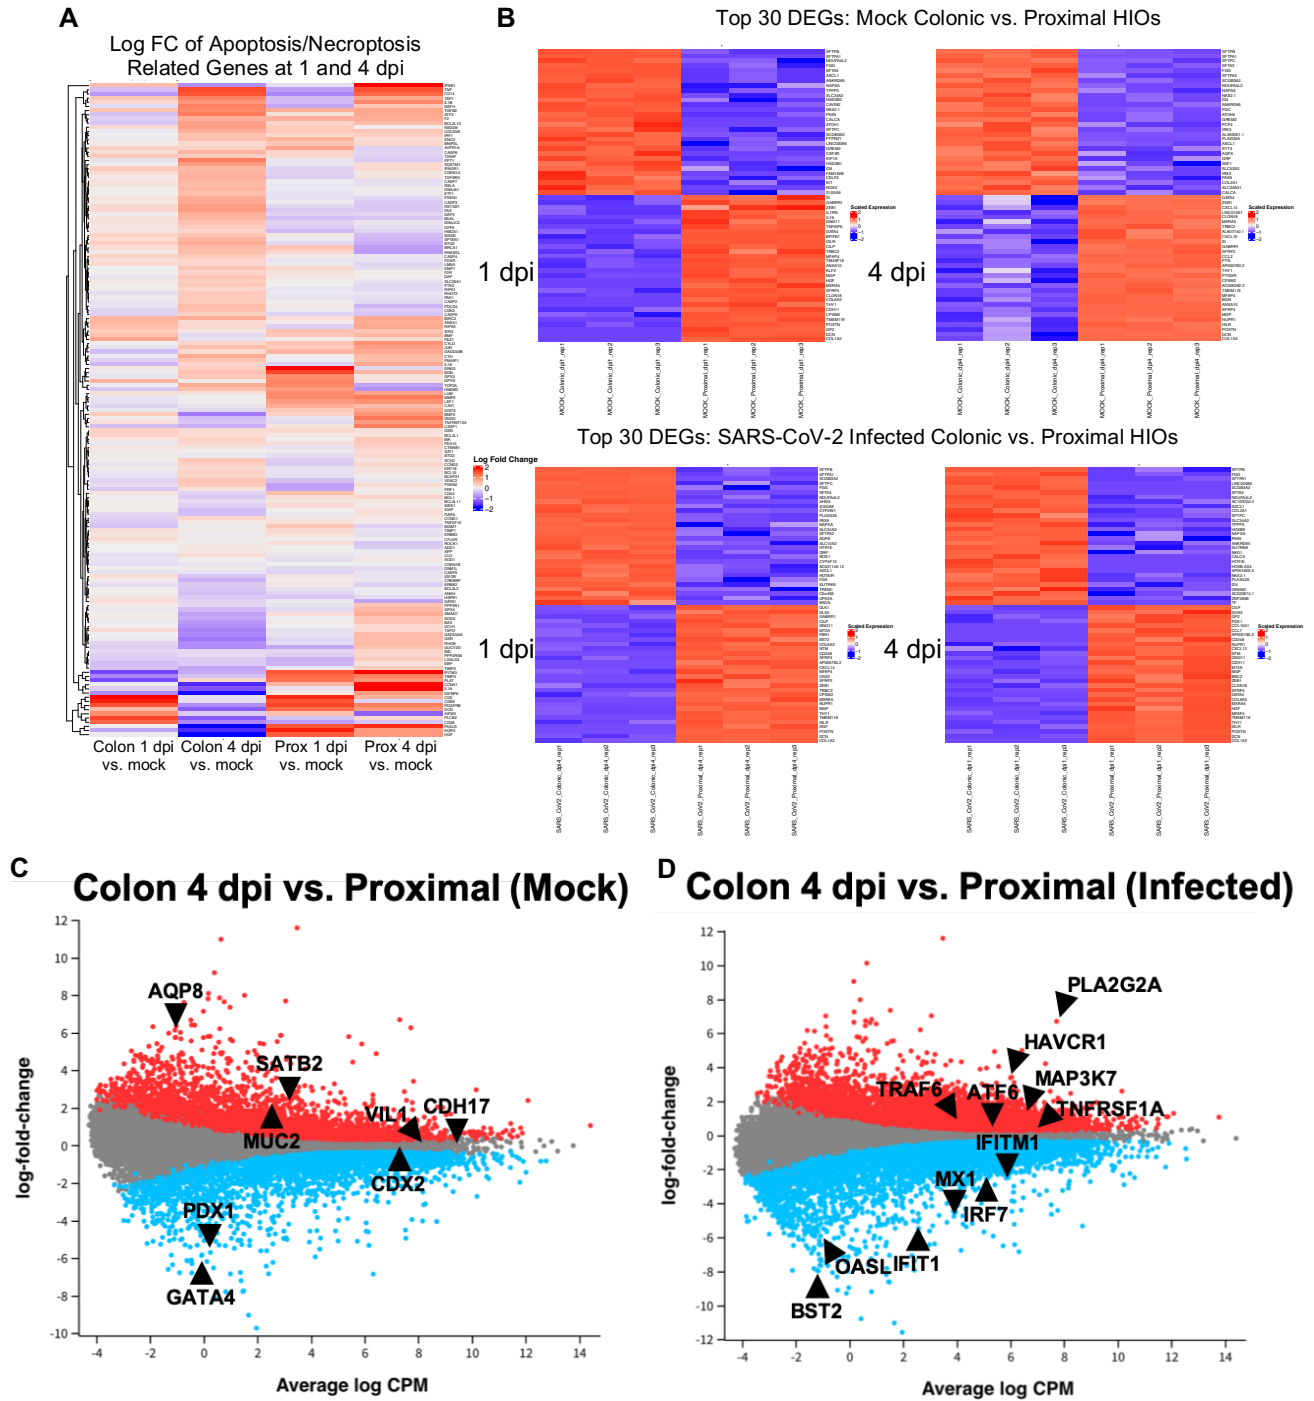

Figure S4: Differential baseline and host response to infection between colonic and proximal HIOs. Unsupervised hierarchical clustering heat maps analyzing expression of (A) a panel of genes associated with apoptosis and necroptosis by log fold change and (B) of the top 30 differentially expressed genes comparing colonic HIOs to proximal HIOs at 1 and 4 dpi, separating the mock and infected conditions, with each replicate independently represented. (C) Mean average plots comparing the transcriptional state of mock infected colonic vs. proximal HIOs at 4 dpi, with key phenotypic markers of proximal and distal intestinal epithelium highlighted by the black arrowheads. (D) Mean average plots comparing the transcriptional state of SARS-CoV-2 infected colonic vs. proximal HIOs at 4 dpi, with key viral host response markers highlighted by the black arrowheads. Related to Figure 4.

**Table S1: Media Recipes/Composition, Related to Figures 1 - 4**

|                                                                           |                         |                                      |           |
|---------------------------------------------------------------------------|-------------------------|--------------------------------------|-----------|
| <b>Proximal<br/>(IM+CK)</b>                                               | DMEM F/12               | Noggin                               | 500ng/mL  |
|                                                                           | Primocin (100ng/mL)     | R-Spondin                            | 100ng/mL  |
|                                                                           | B27                     | EGF                                  | 100ng/mL  |
|                                                                           | HEPES                   | CHIR99021                            | 3 $\mu$ M |
|                                                                           | Glutamax (100x)         | KGF/FGF7                             | 10ng/mL   |
|                                                                           | N2                      |                                      |           |
| <b>Complete<br/>Serum Free<br/>Differentiation<br/>Medium<br/>(csFDM)</b> | IMDM (75%)              |                                      |           |
|                                                                           | Ham's F/12 (25%)        |                                      |           |
|                                                                           | B27 (with RA)           |                                      |           |
|                                                                           | N2                      |                                      |           |
|                                                                           | 0.05% BSA               |                                      |           |
|                                                                           | Primocin (100ng/mL)     |                                      |           |
|                                                                           | Glutamax (100x)         |                                      |           |
|                                                                           | Ascorbic Acid (50ug/mL) |                                      |           |
|                                                                           | MTG (0.45mM)            |                                      |           |
| <b>Colonic<br/>(CK+DCI)</b>                                               | cSFDM                   | CHIR99021                            | 3 $\mu$ M |
|                                                                           |                         | KGF/FGF7                             | 10ng/mL   |
|                                                                           |                         | Dexamethasone                        | 50nM      |
|                                                                           |                         | cAMP                                 | 0.1mM     |
|                                                                           |                         | 3-isobutyl-1-methyxanthine<br>[IBMX] | 0.1mM     |

**Table S2: Comprehensive List of Reagents, Related to Figures 1 - 4**

| <b>REAGENT or RESOURCE</b>                                     | <b>SOURCE</b>                                                                                                                                  | <b>IDENTIFIER</b> |
|----------------------------------------------------------------|------------------------------------------------------------------------------------------------------------------------------------------------|-------------------|
| <u>Antibodies</u>                                              |                                                                                                                                                |                   |
| Calcein Blue                                                   | Life Technologies                                                                                                                              | C1429             |
| Donkey serum                                                   | Jackson Immunoresearch Labs                                                                                                                    | 017-000-121       |
| 13 mm cover slips                                              | ThermoFisher Scientific                                                                                                                        | 174950            |
| Fluoromont -G                                                  | Southern Biotech                                                                                                                               | 0100-01           |
| Rabbit anti-SARS-CoV-2 N                                       | Rockland Immunochemicals                                                                                                                       | Cat# 200-401-A50  |
| Mouse anti-Villin                                              | Millipore                                                                                                                                      | MAB1671           |
| Hoechst 33342                                                  | ThermoFisher Scientific                                                                                                                        | 62249             |
| Chicken Anti- GFP IgY                                          | ThermoFisher Scientific                                                                                                                        | A10262            |
| Donkey anti-chicken AF488                                      | Jackson Immunoresearch Labs                                                                                                                    | 703-545-155       |
| Anti-TMPRSS2                                                   | Abcam                                                                                                                                          | Ab 92323          |
| <u>Bacterial and Virus Strains</u>                             |                                                                                                                                                |                   |
| SARS-CoV-2 IsolateUSA_WA1/2020                                 | Kindly provided by CDC's Principal Investigator Natalie Thornburg and the World Reference Center for Emerging Viruses and Arboviruses (WRCEVA) | N/A               |
| <u>Chemicals, Peptides, and Recombinant Proteins</u>           |                                                                                                                                                |                   |
| Growth Factor Reduced Matrigel                                 | Corning                                                                                                                                        | 356230            |
| Matrigel Basement Membrane Matrix                              | Corning                                                                                                                                        | 354234            |
| SB431542                                                       | Tocris                                                                                                                                         | 1614              |
| Dorsomorphin                                                   | Stemgent                                                                                                                                       | 04-0024           |
| CHIR99021                                                      | Tocris                                                                                                                                         | 4423              |
| Recombinant human KGF                                          | R&D Systems                                                                                                                                    | 251-KG-010        |
| Recombinant human BMP4                                         | R&D Systems                                                                                                                                    | 314-BP            |
| Retinoic acid                                                  | Sigma                                                                                                                                          | R2625             |
| Y-27632 dihydrochloride                                        | Tocris                                                                                                                                         | 1254              |
| Dexamethasone                                                  | Sigma                                                                                                                                          | D4902             |
| 8-bromoadenosine 3',5'-cyclic monophosphate sodium salt (cAMP) | Sigma                                                                                                                                          | B7880             |
| 3-Isobutyl-1-methylxanthine (IBMX)                             | Sigma                                                                                                                                          | I5879             |
| 0.05% trypsin-EDTA                                             | Invitrogen                                                                                                                                     | 25300-120         |
| Defined Fetal Bovine Serum                                     | Thermo Fisher                                                                                                                                  | NC0652331         |
| Recombinant human Noggin                                       | R&D Systems                                                                                                                                    | 6057NG025         |
| Recombinant human EGF                                          | R&D Systems                                                                                                                                    | 236EG200          |

|                                                               |                                       |                                                                     |
|---------------------------------------------------------------|---------------------------------------|---------------------------------------------------------------------|
| Recombinant Human R-Spondin 1 Protein                         | R&D Systems                           | 4645-RS-025                                                         |
| Ascorbic Acid                                                 | Sigma                                 | A4403                                                               |
| <u>Critical Commercial Assays</u>                             |                                       |                                                                     |
| RNeasy Mini Kit                                               | QIAGEN                                | 79306                                                               |
| NEBNext Low Input RNA Kit                                     | New England Biolabs                   | E6420                                                               |
| SuperScript™ III First-Strand Synthesis System                | Invitrogen                            | 18080093                                                            |
| <u>Deposited Data</u>                                         |                                       |                                                                     |
| Bulk RNA-seq                                                  | This paper                            | GEO: GSE159201                                                      |
| <u>Experimental Models: Cell Lines</u>                        |                                       |                                                                     |
| Human: Normal donor iPSC line targeted with CDX2-eGFP (BU1CG) | Mostoslavsky Lab (Mithal et al, 2020) | <a href="http://stemcellbank.bu.edu">http://stemcellbank.bu.edu</a> |
| <u>Oligonucleotides</u>                                       |                                       |                                                                     |
| Taqman Gene Expression Assay Primer/Probe                     | N/A                                   | N/A                                                                 |
| CDH17                                                         | Thermo Fisher                         | Hs00900408_m1                                                       |
| GAPDH                                                         | Thermo Fisher                         | Hs99999905_m1                                                       |
| CDX2                                                          | Thermo Fisher                         | Hs01078080_m1                                                       |
| LYZ                                                           | Thermo Fisher                         | Hs00426232_m1                                                       |
| VIL1                                                          | Thermo Fisher                         | Hs00200229_m1                                                       |
| ACE2                                                          | Thermo Fisher                         | Hs01085333_m1                                                       |
| TMPRSS2                                                       | Thermo Fisher                         | Hs01122322_m1                                                       |
| SARS-CoV-2 N                                                  | IDT                                   | 10006606                                                            |
| <u>Software and Algorithms</u>                                |                                       |                                                                     |
| FlowJo                                                        | TreeStar, Inc                         | <a href="https://www.flowjow.com">https://www.flowjow.com</a>       |
| Prism 8.0                                                     | Graphpad, Inc                         | <a href="https://www.graphpad.com">https://www.graphpad.com</a>     |
| ImageJ                                                        | National Institutes of Health         | <a href="https://imagej.nih.gov/ij">https://imagej.nih.gov/ij</a>   |
| <u>Other</u>                                                  |                                       |                                                                     |
| Cell Recovery Solution                                        | Corning                               | 354253                                                              |
| Paraformaldehyde                                              | Electron Microscopy Sciences          | 19208                                                               |
| ReLeSR                                                        | StemCell Technologies                 | 05873                                                               |
| StemDiff Definitive Endoderm Kit                              | StemCell Technologies                 | 05110                                                               |
| N2 Supplement                                                 | Invitrogen                            | 17502-048                                                           |
| B27 Supplement                                                | Invitrogen                            | 12587-010                                                           |
| GlutaMAX™                                                     | Thermo Fisher                         | 35050061                                                            |
| Gentle Cell Dissociation Reagent                              | StemCell Technologies                 | 07174                                                               |
